# Supplementary material
Source: Springer Nature journal article supplement (https://www.springermedizin.de/resource/supplementary/12931_2012_1241_MOESM1_ESM.pdf/9425826)
Supplement: MOESM1 [file 9425826]

**Sampled population**

**N=1392**

**N=29 excluded for not meeting all inclusion criteria**

**N=1363**

**N=77 excluded, for being out of the age range**

**N=1286**

**Development population  
N=855**

**Validation population  
N=431**

**Measurements  
made**

**N=302**

**FeNO**

**N=804**

**ACQ7**

**N=852**

**miniAQLQ**

**N=855**

**GINA06**

**N=140**

**FeNO**

**N=402**

**ACQ7**

**N=429**

**miniAQLQ**

**N=431**

**GINA06**
